# Supplementary material
Source: publisher site journal article supplement (https://www.dovepress.com/article/393499)
Supplement: Supplementary file 1 [file get_supplementary_file.php]

**Table S1 search strategy**

| **Database** | **Search strategy** | **Records** |
| --- | --- | --- |
| Pubmed | ((((("Oxytocin"[Mesh]) OR (Oxytocin[Title/Abstract])) OR (Ocytocin[Title/Abstract])) OR (Syntocinon[Title/Abstract])) OR (Pitocin[Title/Abstract])) AND ((((((((((("Depression, Postpartum"[Mesh]) OR (Depression, Postpartum[Title/Abstract])) OR (Postnatal Depression[Title/Abstract])) OR (Depression, Postnatal[Title/Abstract])) OR (Post-Partum Depression[Title/Abstract])) OR (Depression, Post-Partum[Title/Abstract])) OR (Post Partum Depression[Title/Abstract])) OR (Postpartum Depression[Title/Abstract])) OR (Post-Natal Depression[Title/Abstract])) OR (Depression, Post-Natal[Title/Abstract])) OR (Post Natal Depression[Title/Abstract])) | 145 |
| EMBASE | #1 Oxytocin #2 'Oxytocin':ab,ti OR 'Ocytocin':ab,ti OR 'Syntocinon':ab,ti OR 'Pitocin':ab,ti #3 #1 OR #2 #4 Depression, Postpartum #5 'Depression, Postpartum':ab,ti OR 'Postnatal Depression':ab,ti OR 'Depression, Postnatal':ab,ti OR 'Post-Partum Depression':ab,ti OR 'Depression, Post-Partum':ab,ti OR 'Post Partum Depression':ab,ti OR 'Postpartum Depression':ab,ti OR 'Post-Natal Depression':ab,ti OR 'Depression, Post-Natal':ab,ti OR 'Post Natal Depression':ab,ti #6 #4 OR #5 #7 #3 AND #6 | 136 |
| Web of science | (TS=(Oxytocin) OR AB=(Oxytocin OR Ocytocin OR Syntocinon OR Pitocin)) AND (TS=(Depression, Postpartum) OR AB=(Depression, Postpartum OR Postnatal Depression OR Depression, Postnatal OR Post-Partum Depression OR Depression, Post-Partum OR Post Partum Depression OR Postpartum Depression OR Post-Natal Depression OR Depression, Post-Natal OR Post Natal Depression)) | 180 |
| Cochrane | #1 MeSH descriptor: [Oxytocin] explode all trees  #2 (Oxytocin OR Ocytocin OR Syntocinon OR Pitocin):ti,ab,kw (Word variations have been searched)  #3 #1 or #2  #4 MeSH descriptor: [Depression, Postpartum] explode all trees  #5 (Depression, Postpartum OR Postnatal Depression OR Depression, Postnatal OR Post-Partum Depression OR Depression, Post-Partum OR Post Partum Depression OR Postpartum Depression OR Post-Natal Depression OR Depression, Post-Natal OR Post Natal Depression):ti,ab,kw (Word variations have been searched)  #6 #4 or #5  #7 #3 and #6 | 56 |

Note: Literature search was conducted on 18 April 2022.
